# Supplementary material for: Determination of Melting Parameters of Cyclodextrins Using Fast Scanning Calorimetry
Source: MDPI journal article supplement (doi:10.3390/ijms232113120), 2022-10-28
Supplement: s1 [file s1]

# Determination of Melting Parameters of Cyclodextrins Using Fast Scanning Calorimetry

## Supplementary Material

### Table of contents

|                                                                                 |    |
|---------------------------------------------------------------------------------|----|
| FSC curves.....                                                                 | 2  |
| TG/DSC curves .....                                                             | 3  |
| Correlation between onset temperatures obtained from DSC and TG data .....      | 4  |
| Flynn-Wall-Ozawa analysis for onset points.....                                 | 4  |
| Model-free thermokinetic analysis for CDs thermal decomposition (TG data) ..... | 5  |
| Thermokinetic analysis – best fit model .....                                   | 8  |
| Molar heat capacity of anhydrous $\gamma$ -cyclodextrin .....                   | 9  |
| Data on $\gamma$ -cyclodextrin melting .....                                    | 11 |
| References .....                                                                | 12 |

## FSC curves

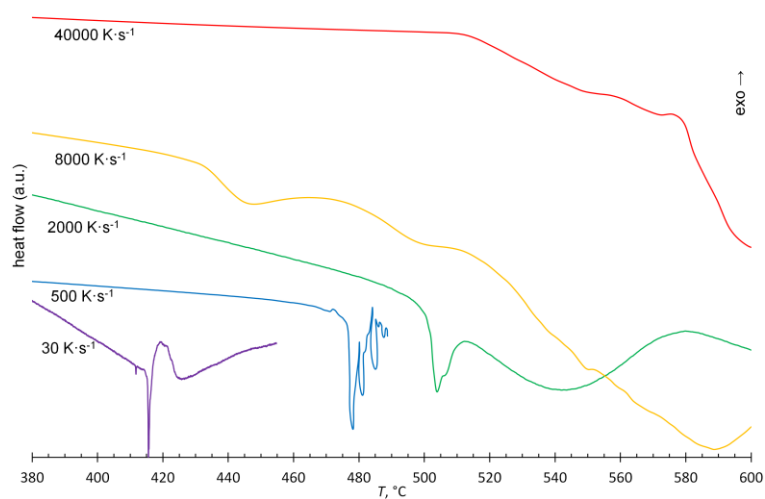

Figure S1. FSC curves for beta-cyclodextrin.

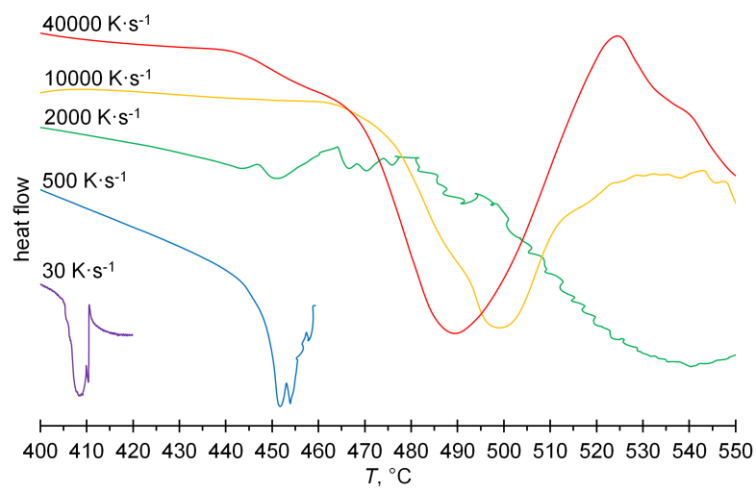

Figure S2. FSC curves for gamma-cyclodextrin.

### TG/DSC curves

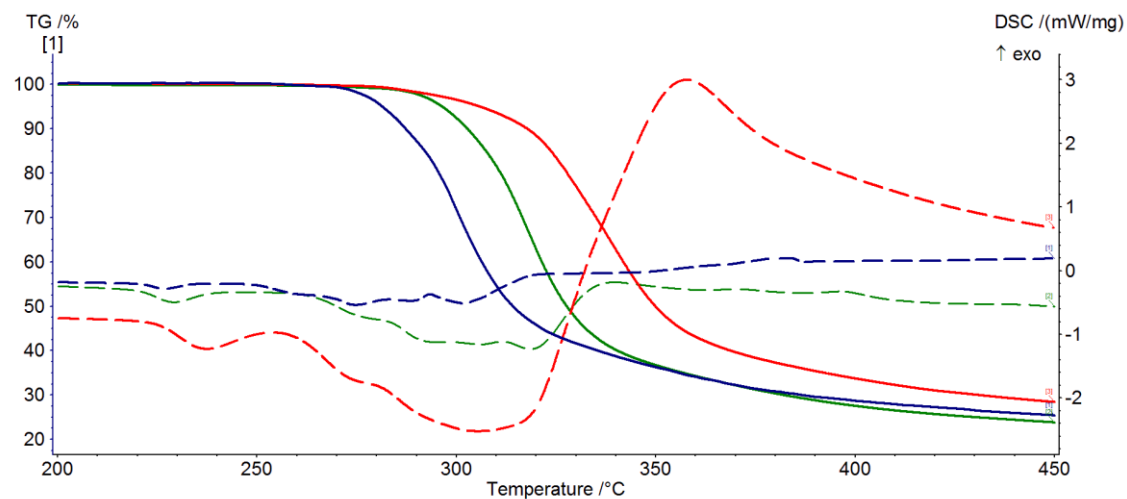

Figure S3. Combined TG/DSC analysis for beta-cyclodextrin at heating rates 4 (blue), 10 (green) and 30 (red)  $\text{K}\cdot\text{min}^{-1}$ .

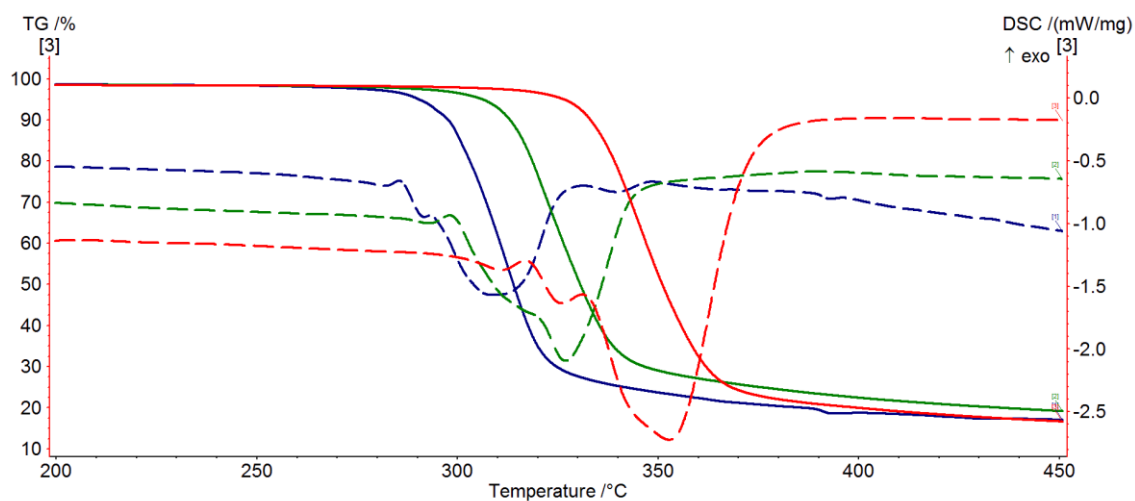

Figure S4. Combined TG/DSC analysis for gamma-cyclodextrin at heating rates 4 (blue), 10 (green) and 30 (red)  $\text{K}\cdot\text{min}^{-1}$ .

**Correlation between onset temperatures obtained from DSC and TG data**

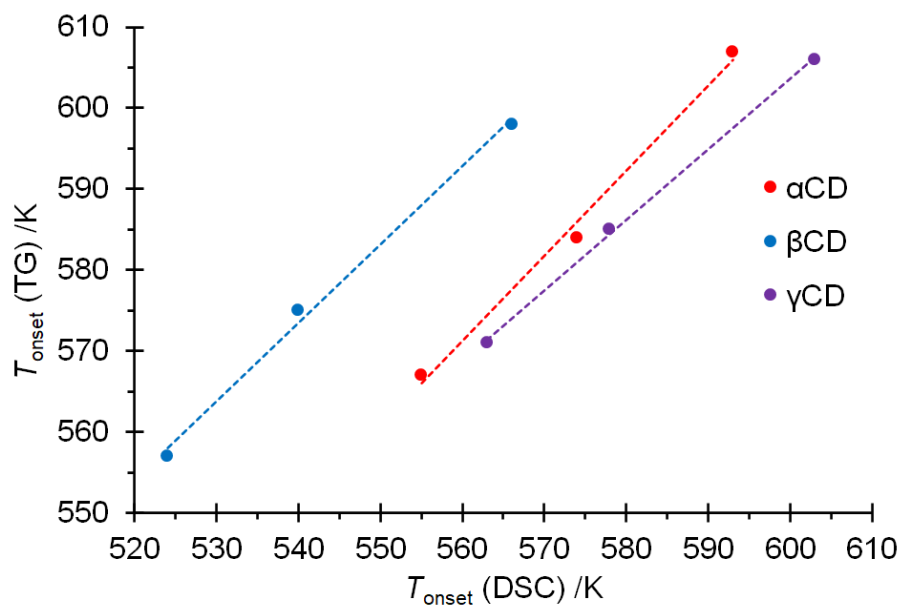

Figure S5. Correlation between onset temperatures of CDs decomposition obtained by TG and DSC.

#### Flynn-Wall-Ozawa analysis for onset points

In Flynn-Wall-Ozawa (FWO) method,  $T_o$  points (DSC and FSC) were plotted in coordinates  $\lg$  heating rate ( $\lg\beta$ ) against  $1000/T_o$ . Linear dependencies corresponding to decomposition onset have a slope equal to  $-0.4567(E_a/R)$ . [1]

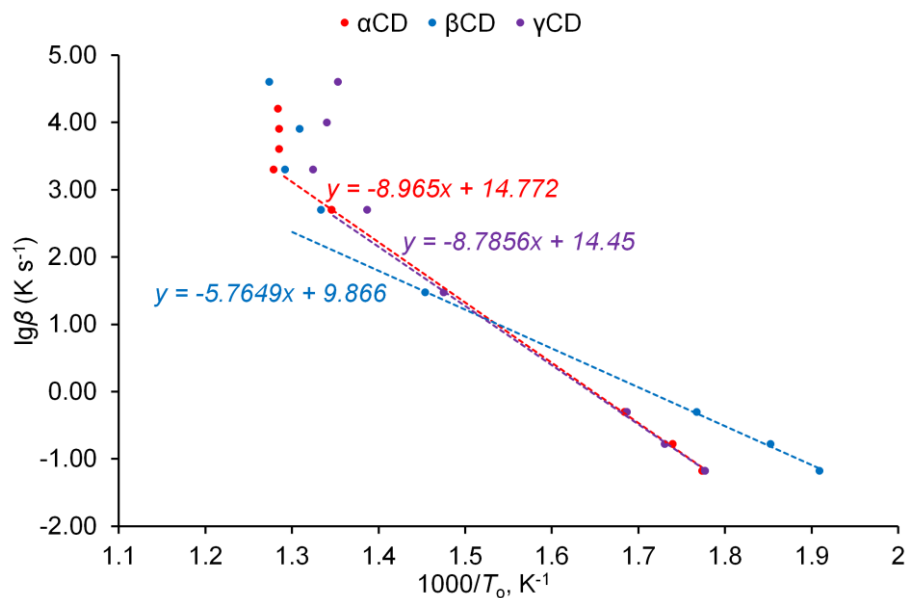

Figure S6. Flynn–Wall–Ozawa analysis for onset points of decomposition of natural cyclodextrins.

Corresponding  $E_a$  for initial stage of decomposition:

$$\alpha\text{CD}: E_a = -8.97 \cdot R / (-0.4567) = 163 \text{ (kJ mol}^{-1}\text{)}$$

$$\beta\text{CD}: E_a = -5.76 \cdot R / (-0.4567) = 105 \text{ (kJ mol}^{-1}\text{)}$$

$$\gamma\text{CD}: E_a = -8.79 \cdot R / (-0.4567) = 160 \text{ (kJ mol}^{-1}\text{)}$$

## Model-free thermokinetic analysis for CDs thermal decomposition (TG data)

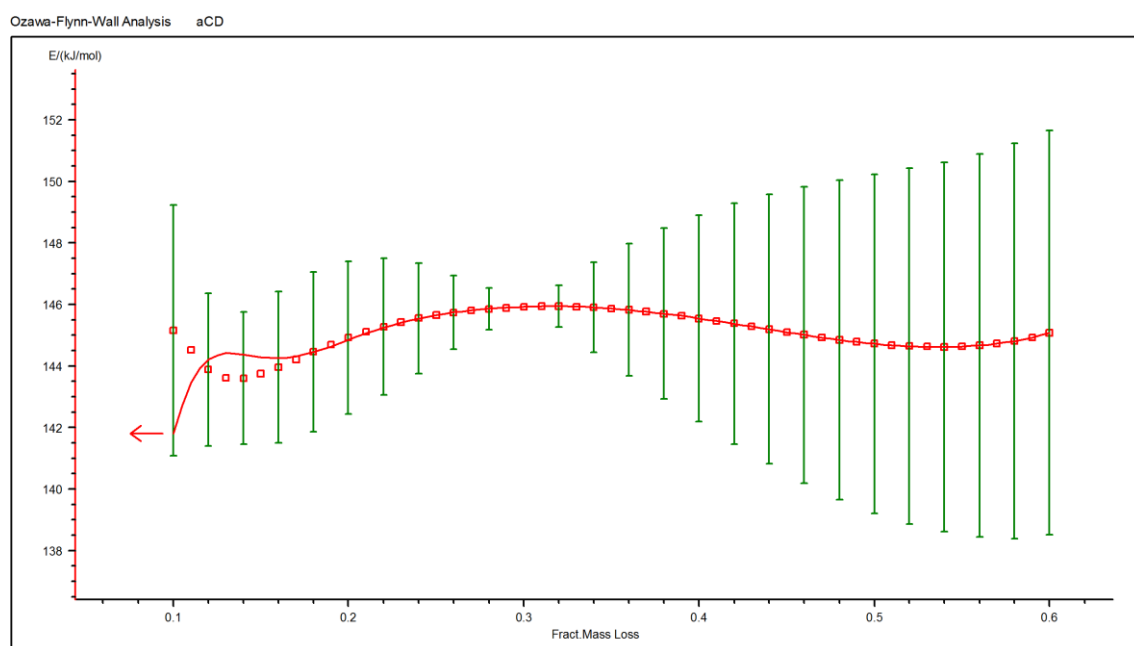

Figure S7. Isoconversional kinetic analysis (Flynn–Wall–Ozawa method) for alpha-cyclodextrin thermal decomposition.

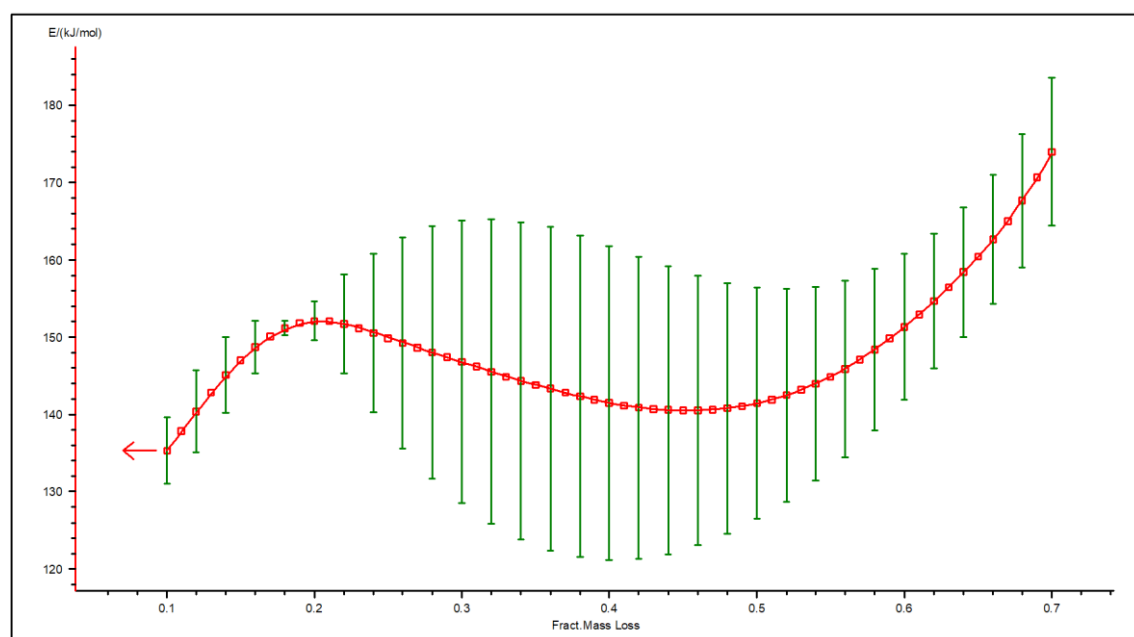

Figure S8. Isoconversional kinetic analysis (Friedman method) for alpha-cyclodextrin thermal decomposition.

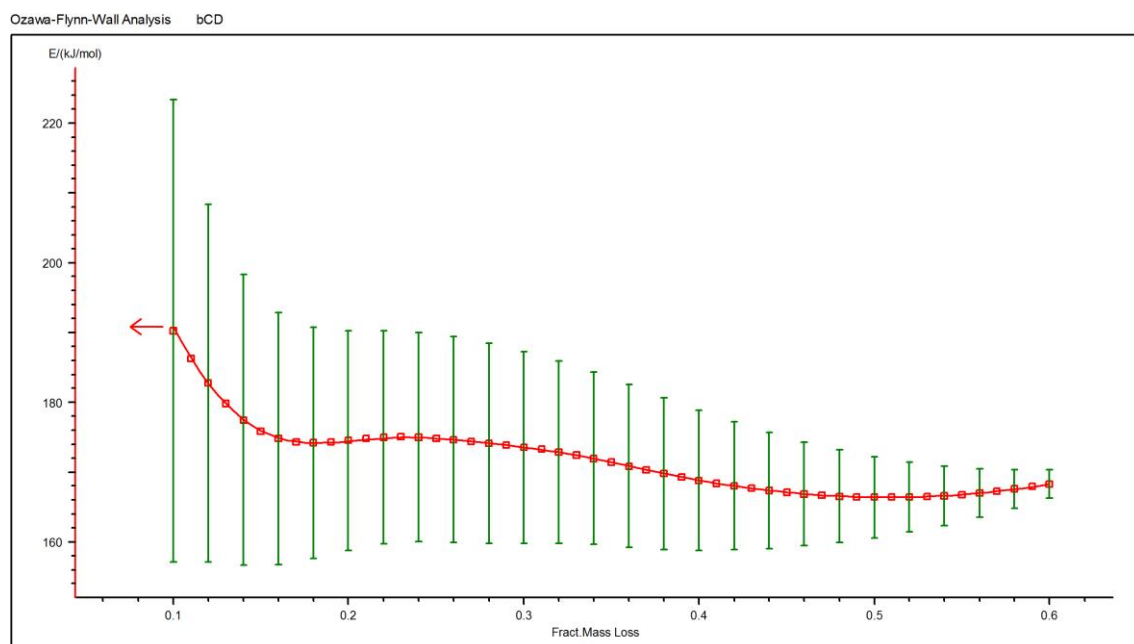

Figure S9. Isoconversional kinetic analysis (Flynn–Wall–Ozawa method) for beta-cyclodextrin thermal decomposition.

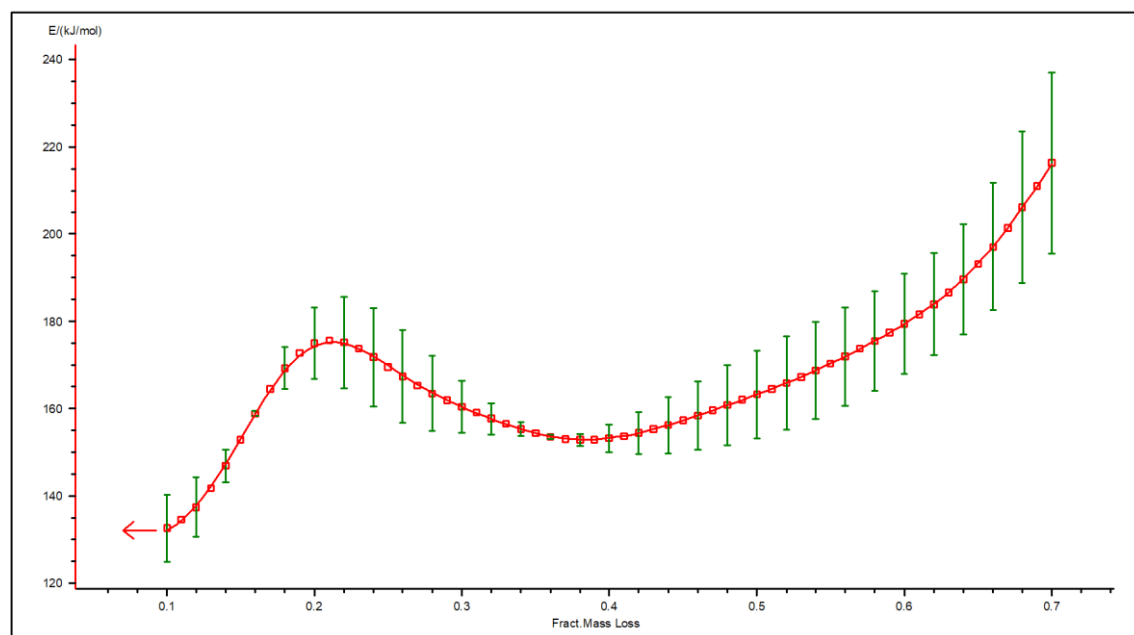

Figure S10. Isoconversional kinetic analysis (Friedman method) for beta-cyclodextrin thermal decomposition.

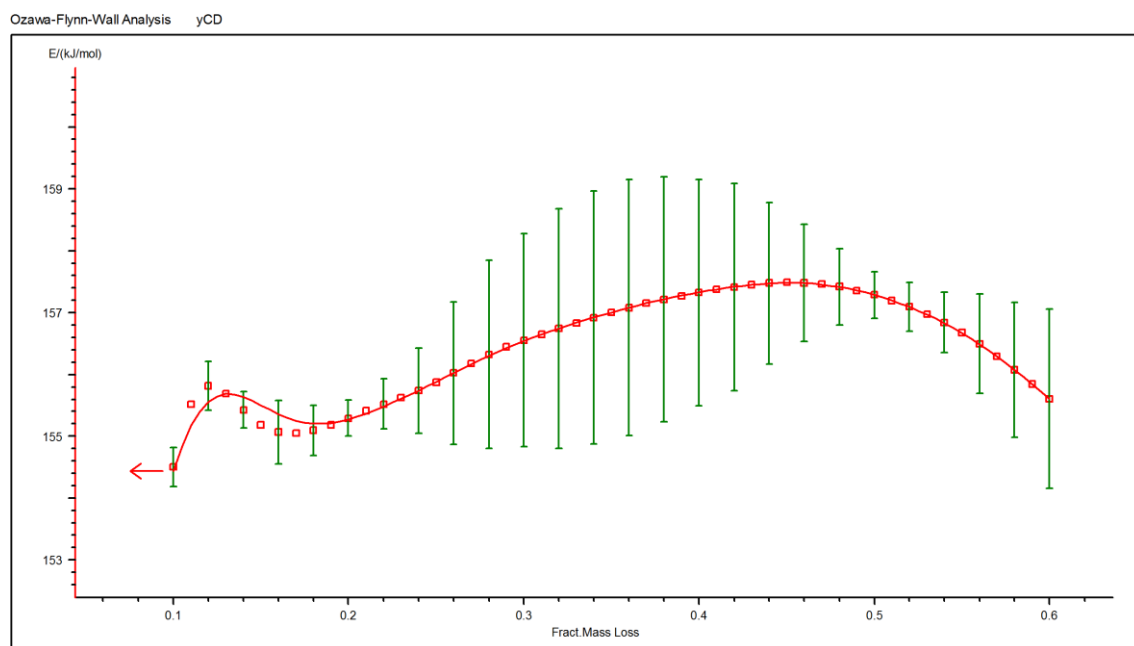

Figure S11. Isoconversional kinetic analysis (Flynn–Wall–Ozawa method) for gamma-cyclodextrin thermal decomposition.

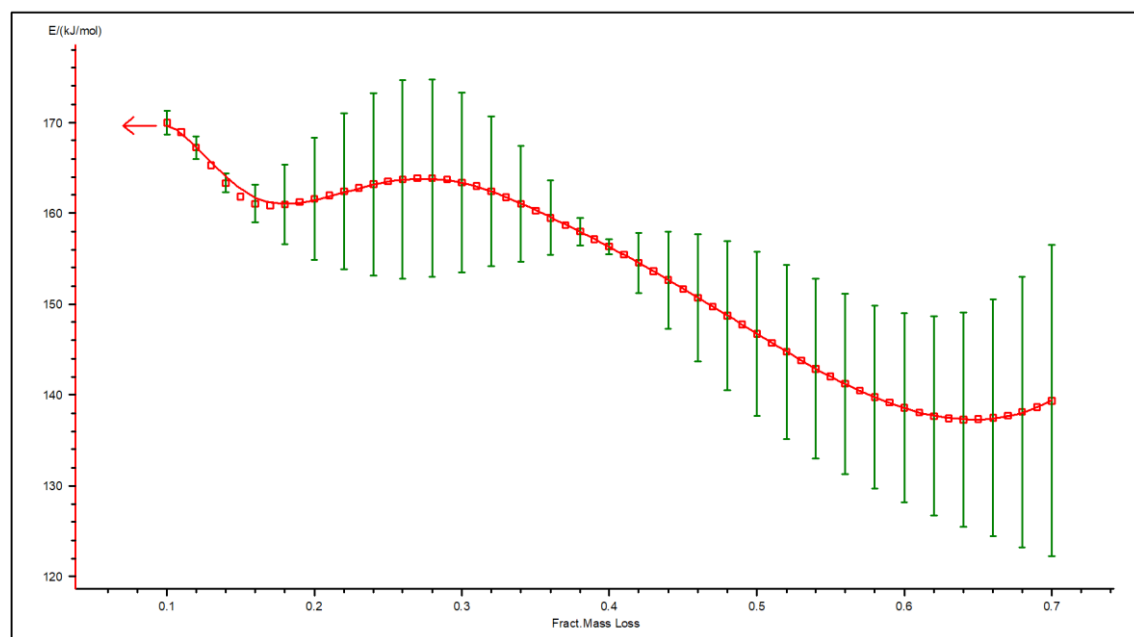

Figure S12. Isoconversional kinetic analysis (Friedman method) for gamma-cyclodextrin thermal decomposition.

Table S1. Activation energies ( $\text{kJ mol}^{-1}$ ) of cyclodextrin thermal decomposition found by model-free methods. \*

|                         | alpha-cyclodextrin | beta-cyclodextrin | gamma-cyclodextrin |
|-------------------------|--------------------|-------------------|--------------------|
| Flynn–Wall–Ozawa method | 145.8              | 174.4             | 155.6              |
| Friedman method         | 148.9              | 168.6             | 153.7              |

\* averaged for conversion degree 0.1–0.7.

### Thermokinetic analysis – best fit model

Table S2. Thermokinetics approximation for TG data of natural cyclodextrins decomposition by best model found.

|                          | alpha-cyclodextrin | beta-cyclodextrin | gamma-cyclodextrin |
|--------------------------|--------------------|-------------------|--------------------|
| best model               | CnB                | CnB               | CnB                |
| $\log A$                 | 9.036              | 12.989            | 9.937              |
| $E_a/\text{kJ mol}^{-1}$ | 147                | 177               | 156                |
| reaction order           | 3.01               | 3.37              | 2.77               |
| correlation coefficient  | 0.999577           | 0.999321          | 0.999294           |



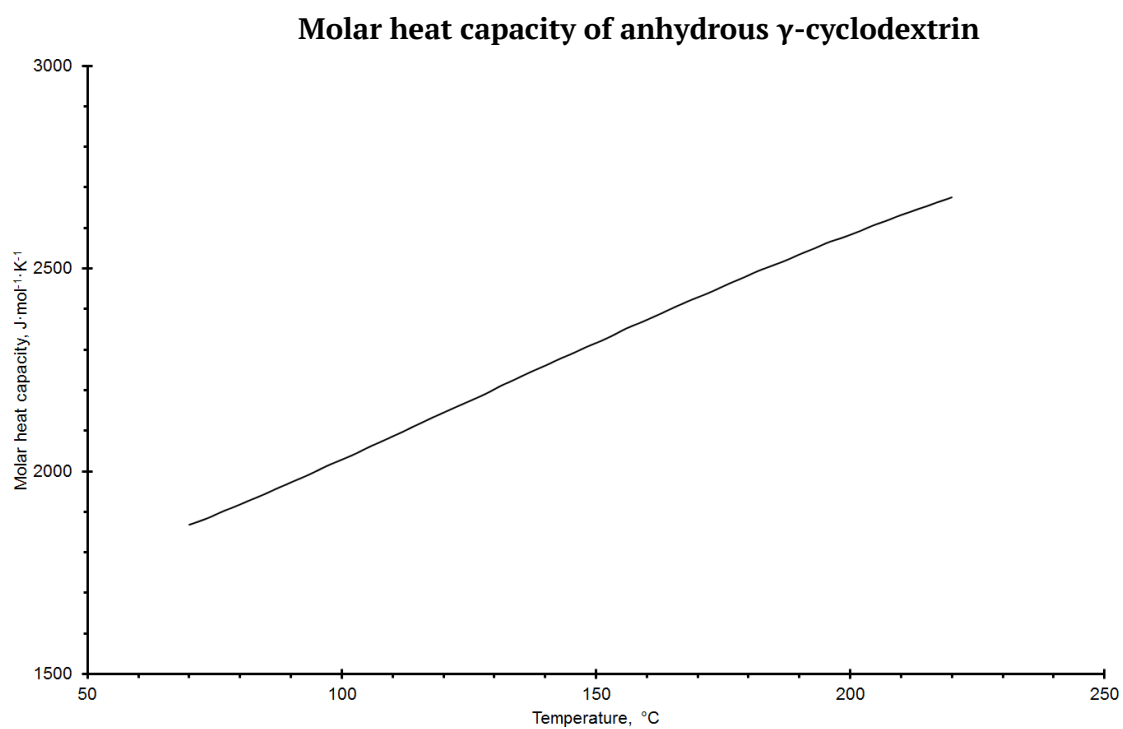

Figure S13. Molar heat capacity of anhydrous  $\gamma$ -cyclodextrin, obtained by DSC with usage of sapphire standard.

Table S3. Molar heat capacity of anhydrous  $\gamma$ -cyclodextrin, obtained by DSC with usage of sapphire standard.

| Temp. /°C | $C_p$ / J mol <sup>-1</sup> K <sup>-1</sup> | Temp. /°C | $C_p$ / J mol <sup>-1</sup> K <sup>-1</sup> | Temp. /°C | $C_p$ / J mol <sup>-1</sup> K <sup>-1</sup> |
|-----------|---------------------------------------------|-----------|---------------------------------------------|-----------|---------------------------------------------|
| 70        | 1868.65                                     | 120       | 2145.03                                     | 170       | 2429.13                                     |
| 71        | 1873.07                                     | 121       | 2150.69                                     | 171       | 2434.00                                     |
| 72        | 1877.41                                     | 122       | 2156.25                                     | 172       | 2439.13                                     |
| 73        | 1882.00                                     | 123       | 2161.77                                     | 173       | 2444.59                                     |
| 74        | 1886.99                                     | 124       | 2167.33                                     | 174       | 2450.41                                     |
| 75        | 1892.60                                     | 125       | 2172.79                                     | 175       | 2456.27                                     |
| 76        | 1898.44                                     | 126       | 2178.27                                     | 176       | 2461.91                                     |
| 77        | 1903.79                                     | 127       | 2183.86                                     | 177       | 2467.36                                     |
| 78        | 1908.68                                     | 128       | 2189.60                                     | 178       | 2472.52                                     |
| 79        | 1913.55                                     | 129       | 2195.74                                     | 179       | 2477.77                                     |
| 80        | 1918.78                                     | 130       | 2202.57                                     | 180       | 2483.50                                     |
| 81        | 1924.24                                     | 131       | 2209.35                                     | 181       | 2489.35                                     |
| 82        | 1929.58                                     | 132       | 2215.26                                     | 182       | 2494.71                                     |
| 83        | 1934.66                                     | 133       | 2220.72                                     | 183       | 2499.46                                     |
| 84        | 1939.80                                     | 134       | 2226.43                                     | 184       | 2504.05                                     |
| 85        | 1945.21                                     | 135       | 2232.47                                     | 185       | 2508.75                                     |
| 86        | 1950.94                                     | 136       | 2238.53                                     | 186       | 2513.52                                     |
| 87        | 1956.73                                     | 137       | 2244.37                                     | 187       | 2518.36                                     |
| 88        | 1962.24                                     | 138       | 2249.94                                     | 188       | 2523.55                                     |
| 89        | 1967.59                                     | 139       | 2255.36                                     | 189       | 2529.23                                     |
| 90        | 1973.07                                     | 140       | 2260.80                                     | 190       | 2534.74                                     |
| 91        | 1978.52                                     | 141       | 2266.53                                     | 191       | 2539.92                                     |
| 92        | 1983.82                                     | 142       | 2272.53                                     | 192       | 2544.95                                     |
| 93        | 1989.22                                     | 143       | 2278.26                                     | 193       | 2550.02                                     |
| 94        | 1994.98                                     | 144       | 2283.61                                     | 194       | 2555.47                                     |
| 95        | 2001.06                                     | 145       | 2288.80                                     | 195       | 2561.10                                     |
| 96        | 2007.28                                     | 146       | 2294.33                                     | 196       | 2566.09                                     |
| 97        | 2013.28                                     | 147       | 2300.36                                     | 197       | 2570.28                                     |
| 98        | 2018.72                                     | 148       | 2306.16                                     | 198       | 2574.18                                     |
| 99        | 2023.90                                     | 149       | 2311.51                                     | 199       | 2578.51                                     |
| 100       | 2029.18                                     | 150       | 2316.60                                     | 200       | 2583.22                                     |
| 101       | 2034.50                                     | 151       | 2321.81                                     | 201       | 2587.96                                     |
| 102       | 2039.82                                     | 152       | 2327.47                                     | 202       | 2592.88                                     |
| 103       | 2045.59                                     | 153       | 2333.40                                     | 203       | 2598.24                                     |
| 104       | 2051.80                                     | 154       | 2339.76                                     | 204       | 2603.76                                     |
| 105       | 2058.16                                     | 155       | 2346.53                                     | 205       | 2608.65                                     |
| 106       | 2064.03                                     | 156       | 2352.71                                     | 206       | 2612.95                                     |
| 107       | 2069.42                                     | 157       | 2358.10                                     | 207       | 2617.39                                     |
| 108       | 2074.99                                     | 158       | 2363.11                                     | 208       | 2622.27                                     |
| 109       | 2080.74                                     | 159       | 2368.17                                     | 209       | 2627.28                                     |
| 110       | 2086.54                                     | 160       | 2373.61                                     | 210       | 2631.99                                     |
| 111       | 2092.23                                     | 161       | 2379.24                                     | 211       | 2636.33                                     |
| 112       | 2097.88                                     | 162       | 2384.76                                     | 212       | 2640.61                                     |
| 113       | 2103.99                                     | 163       | 2390.47                                     | 213       | 2645.12                                     |
| 114       | 2110.23                                     | 164       | 2396.37                                     | 214       | 2649.43                                     |
| 115       | 2116.07                                     | 165       | 2402.25                                     | 215       | 2653.51                                     |
| 116       | 2121.89                                     | 166       | 2407.91                                     | 216       | 2658.10                                     |
| 117       | 2128.00                                     | 167       | 2413.37                                     | 217       | 2662.82                                     |
| 118       | 2133.86                                     | 168       | 2418.92                                     | 218       | 2666.97                                     |
| 119       | 2139.40                                     | 169       | 2424.24                                     | 219       | 2671.09                                     |
|           |                                             |           |                                             | 220       | 2675.64                                     |

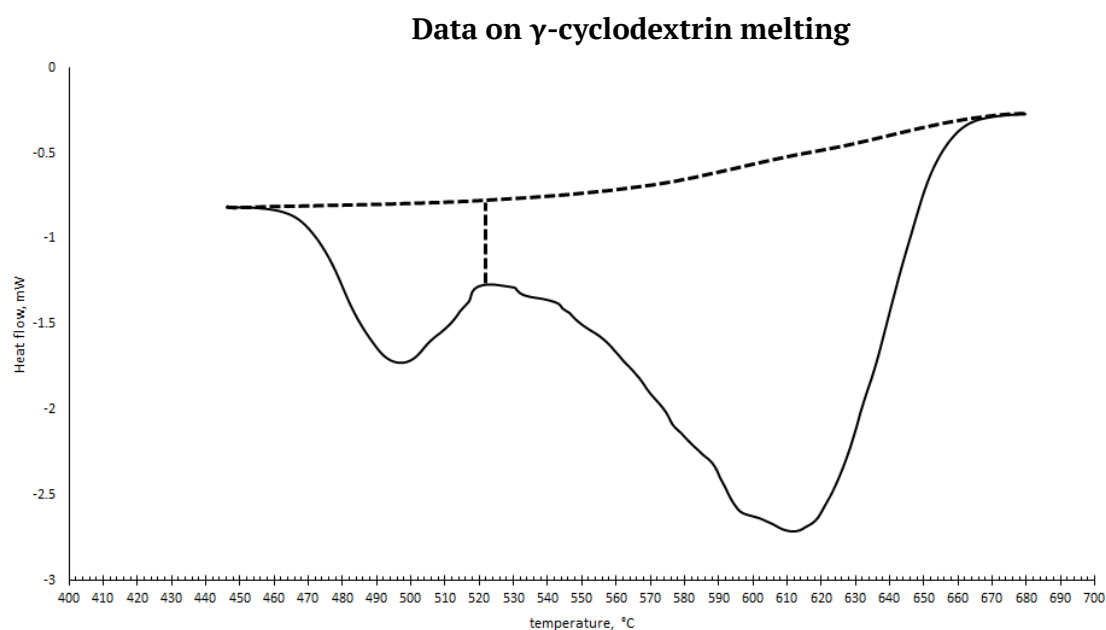

Figure S14. FSC curve of  $\gamma$ -cyclodextrin sample 1 with scanning rate of  $10000 \text{ K}\cdot\text{s}^{-1}$ .

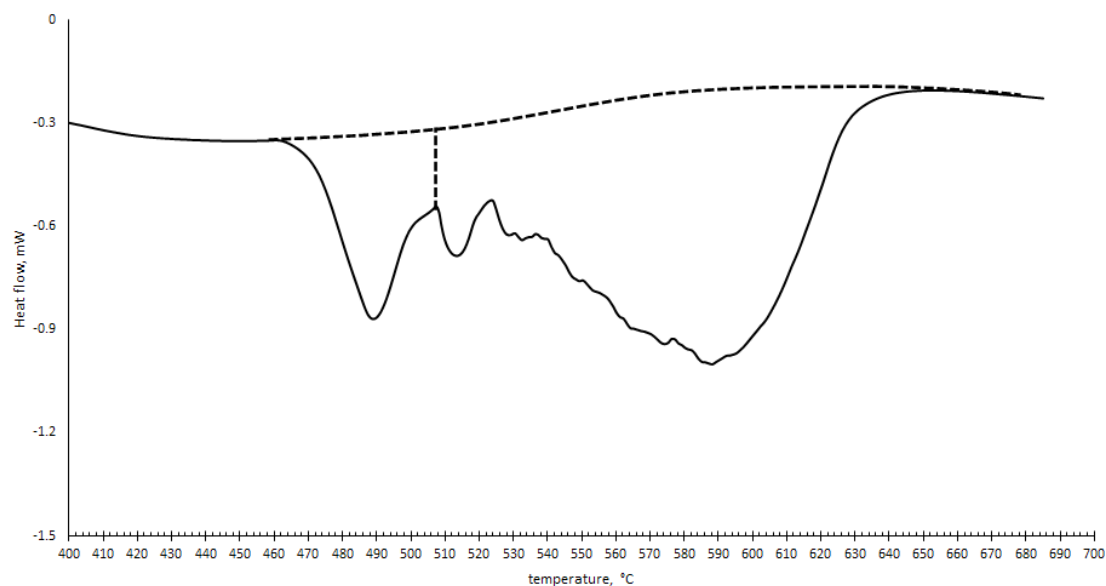

Figure S15. FSC curve of  $\gamma$ -cyclodextrin sample 2 with scanning rate of  $10000 \text{ K}\cdot\text{s}^{-1}$ .

Table S4. Calculation of fusion enthalpy of  $\gamma$ -cyclodextrin.

|          | mol $\gamma$ -CD,<br>according to $C_p$<br>measurements | Summary DSC<br>integral of<br>melting and<br>decomposition<br>/J | Peak fraction<br>corresponding<br>to melting | DSC<br>integral of<br>melting /J | Molar<br>fusion<br>enthalpy<br>/kJ·mol <sup>-1</sup> |
|----------|---------------------------------------------------------|------------------------------------------------------------------|----------------------------------------------|----------------------------------|------------------------------------------------------|
| sample 1 | $1.5496 \cdot 10^{-11}$                                 | $2.284 \cdot 10^{-5}$                                            | 0.1532                                       | $3.498 \cdot 10^{-6}$            | 225.8                                                |
| sample 2 | $5.8643 \cdot 10^{-12}$                                 | $7.012 \cdot 10^{-6}$                                            | 0.1814                                       | $1.272 \cdot 10^{-6}$            | 216.9                                                |

## References

1. Thomas, A.; Moinuddin, K.; Tretsiakova-McNally, S.; Joseph, P. A Kinetic Analysis of the Thermal Degradation Behaviours of Some Bio-Based Substrates. *Polymers (Basel)*. 2020, 12, 1830, doi:10.3390/polym12081830.
